# Supplementary material for: DOM removal from Lake Kinneret by adsorption columns and biodegradation: a pilot study and modeling
Source: Royal Society of Chemistry journal article supplement (doi:10.1039/d4ew00407h), 2024-01-01
Supplement: d4ew00407h2.pdf [file d4ew00407h2.pdf]

1  
2  
3  
4  
5  
6  
7  
8  
9  
10  
11  
12  
13

Supplementary Material

for

**DOM removal from Lake Kinneret by adsorption columns and  
biodegradation: a pilot study and modeling**

Mario L. Kummel<sup>1,2\*#</sup>, Ofri Zusman<sup>1</sup>, Shlomo Nir<sup>1</sup>, Yael G. Mishael<sup>1</sup>

<sup>1</sup>Department of Soil and Water Sciences, The Robert H. Smith Faculty of Agriculture, Food  
and Environment, The Hebrew University of Jerusalem, Rehovot, 7610001, Israel

<sup>2</sup> Water Quality and Resource Unit, Engineering Wing - Mekorot, The Israel National Water  
Company, Tel Aviv 6120101, Israel

#Corresponding author

\*Email: mkummel@mekorot.co.il

## 14 **1. Production of PD-MMT granules for the pilot**

15 Pursuant to adjusting the laboratory preparation protocol<sup>1</sup> to an industrial scale, around 60  
16 kg of granular PDADMAC composite were produced. Under factory conditions, the granule  
17 productions stages were as follows:

- 18 a. Composite production was done in a polypropylene tank of volume of 2 m<sup>3</sup>, by  
19 adding bentonite and PDADMAC polymer at a 1:6 ratio. The mixing was carried out  
20 for two hours followed by pumping to a belt press by a diaphragm pump (Sun  
21 Pepper, USA)
- 22 b. Pressing the created solution was carried out using a 250 L belt press.
- 23 c. Drying the sludge was done in 400 L oven at 70°C for two days.
- 24 d. Performing initial granulation was then carried out.
- 25 e. An additional final drying was done at 105°C.
- 26 f. The final granulation and sifting into particles in a range of 0.6 - 2.3 mm.

27

## 28 **2. Adsorbent characterization**

29 **Table S1a. Physical properties of the granular activated carbon (GAC), regenerated GAC**  
30 **(rGAC), and granular pDADMAC-montmorillonite composite (PD-MMT) used in this study.**

|              | BET surface area                | Zeta potential | Iodine number        |
|--------------|---------------------------------|----------------|----------------------|
|              | m <sup>2</sup> ·g <sup>-1</sup> | mV             | mg·g C <sup>-1</sup> |
| <b>GAC</b>   | 1000 ± 50*                      | -12            | 800                  |
| <b>rGAC</b>  | N.D.                            | -42            | 810                  |
| <b>PD-MT</b> | 14.5**                          | +30            | N.D.                 |

31 \* Donau Carbon<sup>2</sup>, \*\*Zusman *et al.*<sup>1</sup>, N.D. – Not determined

32

33

34 **Table S1b. Elemental composition of GAC and rGAC (%w/w).**

|             | <b>C</b> | <b>O</b> | <b>H</b> | <b>N</b> | <b>S</b> |
|-------------|----------|----------|----------|----------|----------|
| <b>GAC</b>  | 88.8     | 2.1      | 0.6      | 0.18     | 0.46     |
| <b>rGAC</b> | 81.1     | 12.8     | 1.5      | 0.13     | 0.15     |

35

36

37 **3. Lake Kinneret water characteristics.**38 **Table S2: Average results from sampling water quality parameters - Inlet water to pilot in 2019**

| <b>PARAMETER</b>                         | <b>VALUE</b> | <b>UNIT</b> |
|------------------------------------------|--------------|-------------|
| Ammonia as NH <sub>4</sub> <sup>+</sup>  | 0.1          | mg/l        |
| Alkalinity as CaCO <sub>3</sub>          | 126.0        | mg/l        |
| Aluminum                                 | 276.0        | µg/l        |
| Arsenic                                  | 0.8          | µg/l        |
| Boron                                    | 0.1          | mg/l        |
| Barium                                   | 60.8         | µg/l        |
| Bicarbonate AS HCO <sub>3</sub>          | 125.1        | mg/l        |
| Bromide                                  | 2.1          | mg/l        |
| Calcium                                  | 45.6         | mg/l        |
| Copper                                   | 2.2          | µg/l        |
| DOC                                      | 2.9          | mg/l        |
| EC                                       | 1294.6       | dS/cm       |
| Hardness as CaCO <sub>3</sub>            | 254.3        | mg/l        |
| Iron                                     | 40.5         | µg/l        |
| Lead                                     | 0.5          | µg/l        |
| Lithium                                  | 11.9         | µg/l        |
| Magnesium                                | 34.1         | µg/l        |
| Manganese                                | 0.9          | µg/l        |
| Molibdene                                | 1.0          | µg/l        |
| Nitrate as NO <sub>3</sub> <sup>-</sup>  | 0.9          | mg/l        |
| Potassium                                | 8.5          | mg/l        |
| Silica as SiO <sub>2</sub>               | 10.6         | mg/l        |
| Sodium                                   | 148.0        | mg/l        |
| Strontium                                | 680.4        | µg/l        |
| Sulfate as SO <sub>4</sub> <sup>--</sup> | 68.0         | mg/l        |
| TOC                                      | 2.8          | mg/l        |
| Turbidity                                | 0.3          | NTU         |
| UV 254 nm                                | 0.025        | 1/cm        |
| Vanadium                                 | 2.8          | µg/l        |
| Zinc                                     | 33.4         | µg/l        |

39

#### 40 **4. Physical-chemical results monitored at the site.**

41 Physical-chemical parameters were measured in parallel to measurements related to  
42 organic matter. The results are shown for inlet temperature (Fig S1-A), electrical  
43 conductivity for the inlet and outlet (Fig S1-B), pH for the inlet and outlet (Fig S1-C) and  
44 turbidity for the outlet (Fig. S1-D). Here, the results for inlet water, GAC and PD-MMT  
45 outlet water are presented. Changes in the quality of the water entering the pilot columns  
46 during the period of one year were mainly due to changes recorded in Lake Kinneret, which  
47 can affect the water treatment process in general, and affect the DOM adsorption  
48 processes in particular. There was also fluctuation in DOC values (11.4%) and in absorption  
49 at 254 nm (20.8%) from both average values of the inlet water as was shown in Fig. 2 in the  
50 article.

#### 51 **4.1 Temperature**

52 The temperature (Fig S1-A) increased from 17.3<sup>o</sup>C at the beginning of the run in January to  
53 29<sup>o</sup>C at the end of the summer in August. These temperature changes can have a positive  
54 outcome especially on the GAC adsorption process, due to improving DOM removal by  
55 adsorption and by biodegradation by bacteria<sup>3</sup> but might also have a negative effect on  
56 reducing adsorption by PD-MMT<sup>1</sup>.

#### 57 **4.2 pH and electrical conductivity**

58 The water's pH at the entry to the pilot (Fig S1 B) is affected by the water treatment  
59 upstream of the pilot and is also affected by water quality changes in the lake. Until June (~  
60 55,000 PV), the pH at the entrance of the pilot was always below 6.9, but after that the  
61 value rose steadily up to 7.2. The increase in pH in incoming water around June is more or  
62 less consistent with the increase in electrical conductivity (Fig. S1 C) that starts around

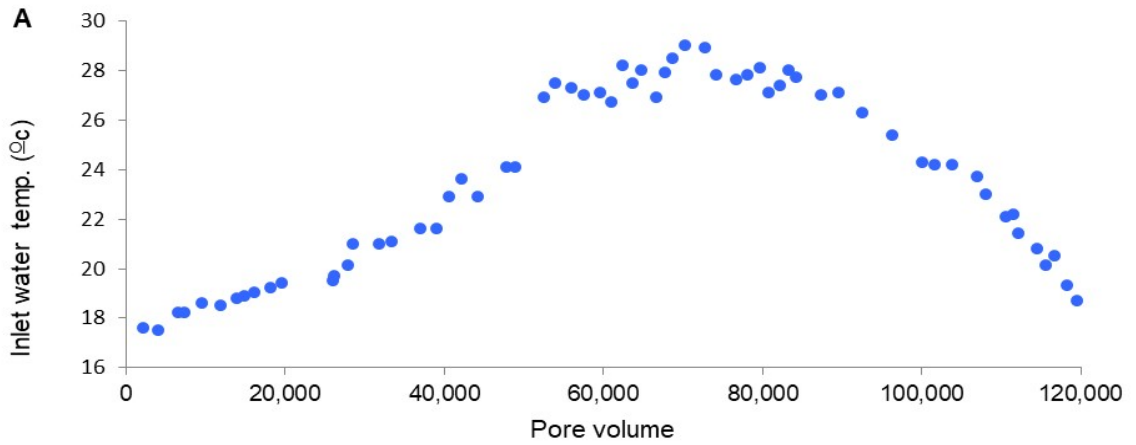

63

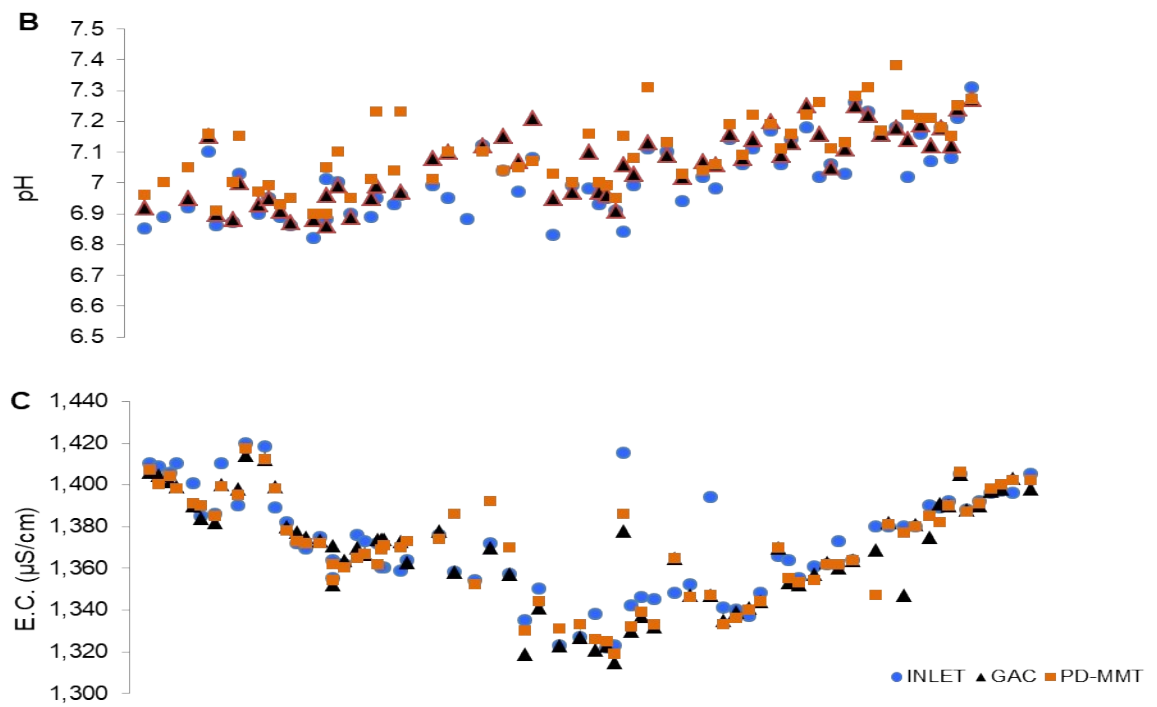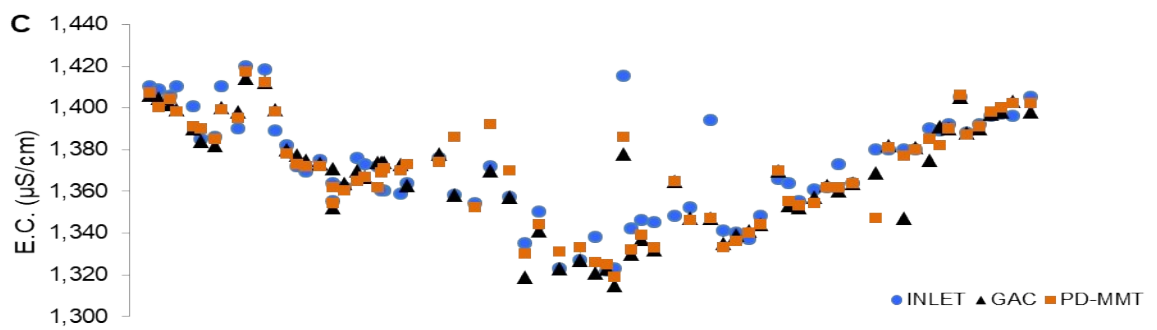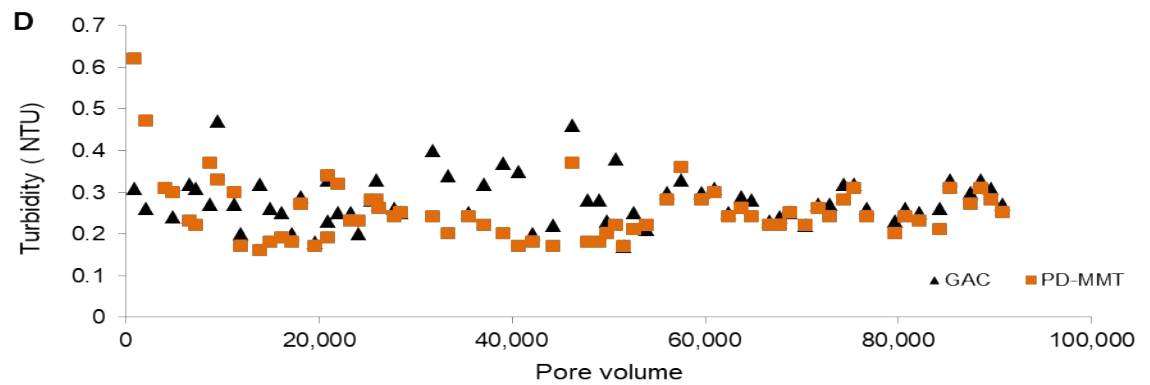

64

65 **Fig. S1: Physical chemical parameters of the water during the pilot running for GAC and PD-**  
 66 **MMT: A- inlet temperature, B - inlet and outlet pH, C- inlet and outlet electrical conductivity,**  
 67 **D - turbidity outlet**

68 1,340  $\mu\text{S}/\text{cm}$  and reaches 1,400  $\mu\text{S}/\text{cm}$  at the end of summer ( $\sim 75,000$  PV) and at the end  
69 of the pilot run.

70 The salinity of Lake Kinneret is significantly higher than the salinity of the water from  
71 surface streams (20–40  $\text{mg L}^{-1}$  chlorides)<sup>4</sup> that flow to the lake, due to the salinity of water  
72 springs located on the western shore of Lake Kinneret.<sup>4</sup>

73 It was suggested that the reduction in the amount of water which enters by streams into  
74 Lake Kinneret in the middle of spring (May $\sim 45,000$  PV) may contribute to a moderate  
75 increase of salinity in the lake.<sup>4,5</sup> The changes in conductivity due to the treatment were  
76 minor. The pH increased after treatment by about 0.1-0.2 pH units on average for media.

#### 77 **4.3 Turbidity**

78 The turbidity of the water (Fig S1-D) treated by adsorption through columns has to be  
79 the same or less than water turbidity (0.3 NTU) after sand filtration prior to adsorption  
80 columns. After a-running for two weeks, the PD-MMT composite improved the turbidity in  
81 93% of the cases to levels below 0.3 NTU, whereas the GAC results yielded some  
82 fluctuation over 0.3 NTU since the middle of the run.

83

84

85

86

87

88

89 **5. Spatial distribution of DOM throughout the columns**

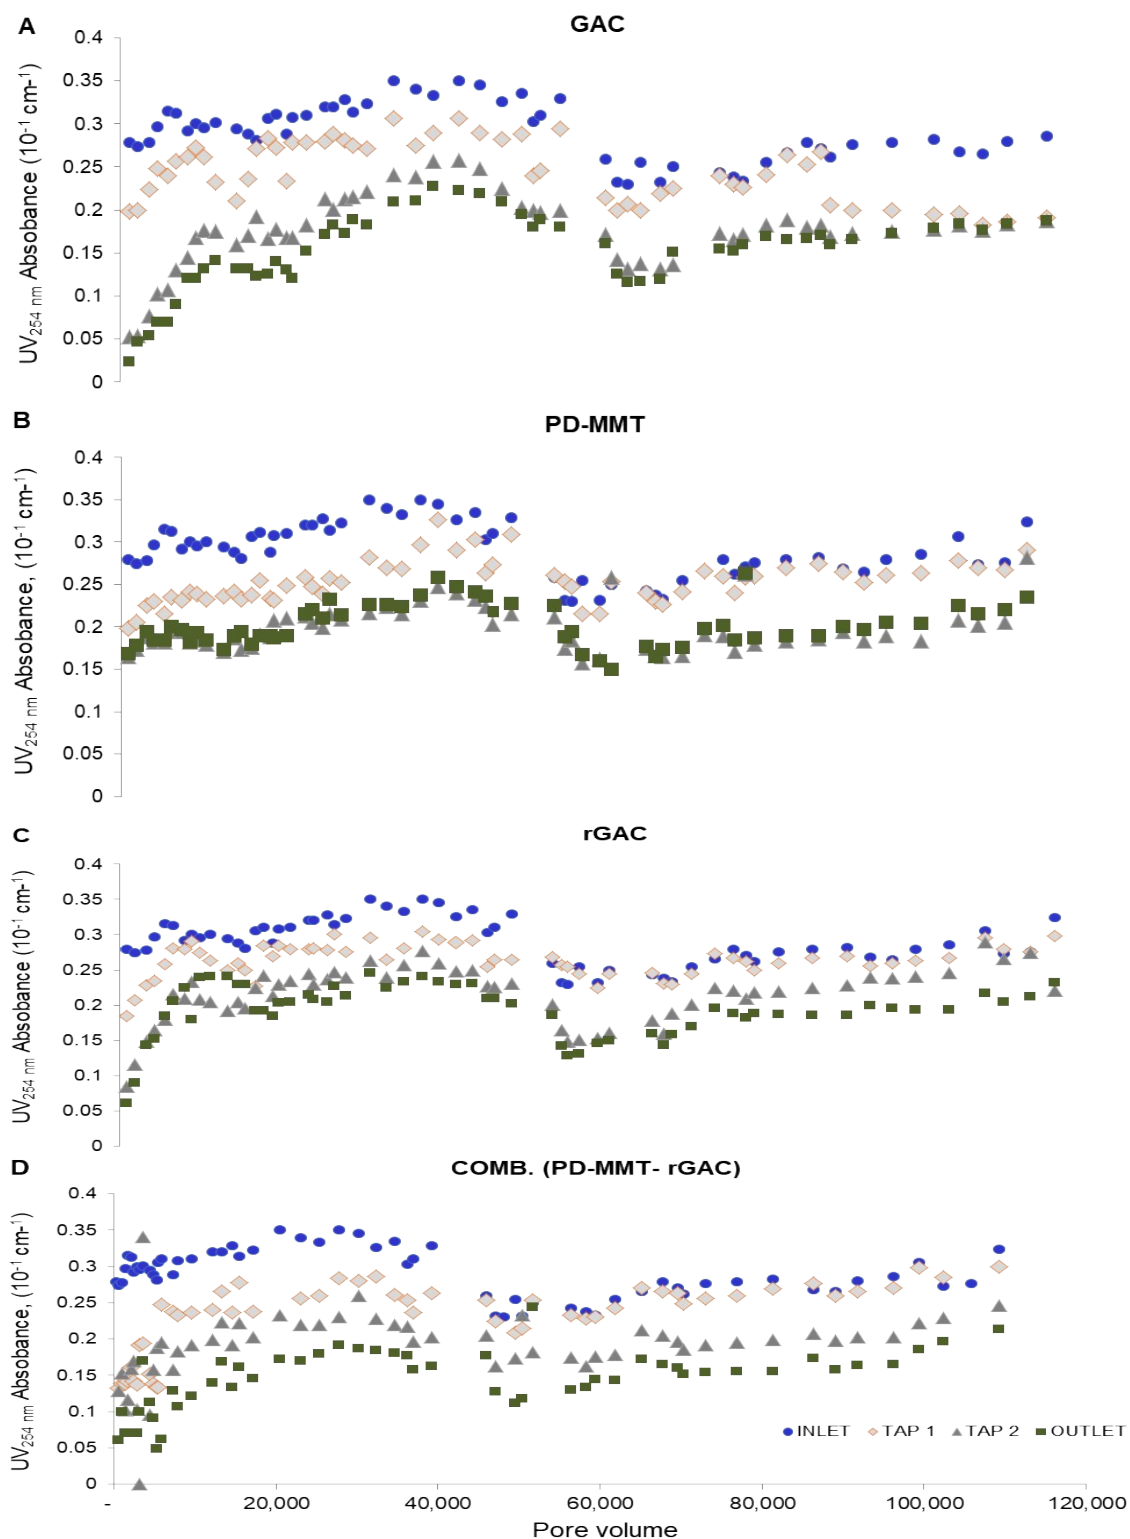

90

91

92 **Fig S2 A-D: Removal of DOM by the four different adsorbents expressed as UV<sub>254</sub> absorption**  
 93 **monitored through three different taps in the column. The distances between the taps were 30**  
 94 **cm, excluding the distance between the top of the media (tap 1) that was 15 cm.**

95

96 **6. Trihalomethanes Formation**

97

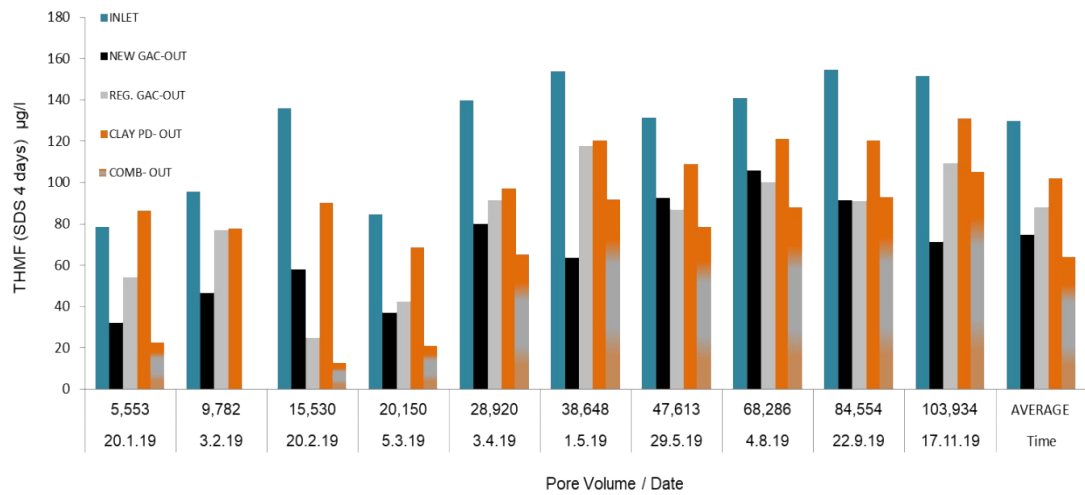

98

99 **Fig. S3: THMF (SDS-96 hrs.) (µg/l) prior and after treatment by different adsorbents during running**

100

101 **Table S3: Example of fraction of different THMFs derived from SDS testing (96 hrs.)**

| THMF       | INLET                |          | GAC         |          | PD-MMT      |          | rGAC        |          | COMB.       |          |       |
|------------|----------------------|----------|-------------|----------|-------------|----------|-------------|----------|-------------|----------|-------|
|            | THMF (µg/L)          | Fraction | THMF (µg/L) | Fraction | THMF (µg/L) | Fraction | THMF (µg/L) | Fraction | THMF (µg/L) | Fraction |       |
| 01/05/2019 | CHBr <sub>3</sub>    | 153.55   | 0.97        | 60.84    | 0.954       | 106.04   | 0.967       | 112.2    | 0.95        | 87.61    | 0.955 |
|            | CHClBr <sub>2</sub>  | 4.41     | 0.028       | 2.32     | 0.036       | 3.08     | 0.028       | 4.71     | 0.040       | 3.19     | 0.035 |
|            | CHCl <sub>2</sub> Br | 0.26     | 0.002       | 0.38     | 0.006       | 0.29     | 0.003       | 0.46     | 0.004       | 0.55     | 0.006 |
|            | CHCl <sub>3</sub>    | 0.25     | 0.002       | 0.21     | 0.003       | 0.23     | 0.002       | 0.28     | 0.002       | 0.35     | 0.004 |
|            | THM TOTAL            | 158.47   | 1           | 63.75    | 1           | 109.64   | 1           | 117.65   | 1           | 91.7     | 1     |
| 27/05/2019 | CHBr <sub>3</sub>    | 125.46   | 0.954       | 88.9     | 0.960       | 95.73    | 0.947       | 83.8     | 0.963       | 74.2     | 0.946 |
|            | CHClBr <sub>2</sub>  | 5.39     | 0.041       | 3.01     | 0.033       | 4.4      | 0.044       | 2.7      | 0.031       | 3.13     | 0.040 |
|            | CHCl <sub>2</sub> Br | 0.4      | 0.003       | 0.35     | 0.004       | 0.67     | 0.007       | 0.25     | 0.003       | 0.59     | 0.008 |
|            | CHCl <sub>3</sub>    | 0.28     | 0.002       | 0.34     | 0.004       | 0.31     | 0.003       | 0.26     | 0.003       | 0.5      | 0.006 |
|            | THM TOTAL            | 131.53   | 1           | 92.6     | 1           | 101.11   | 1           | 87.01    | 1           | 78.42    | 1     |

102

103

104

105

106



## 107 7. Modeling

### 108 7.1. Determination of the parameters ( $F_1$ and $D_1$ ) needed for calculating the removal of 109 FA and NABS<sub>254</sub> from Lake Kinneret water by a GAC filter.

110 The first stage was to determine the parameters that characterize the removal of FA  
111 due to adsorption/desorption by GAC, at similar dissolved salt concentration as in Lake  
112 Kinneret water (see Table S4 below). The results of Kummel *et al.*<sup>6</sup> indicate that the  
113 removal of FA by GAC filtration is enhanced in water whose electrical conductivity is larger.  
114 The electrical conductivity of the water in the lake is about fourfold larger than in the  
115 stream water filtered in Kummel *et al.*<sup>6</sup>

116 The first parameter to be determined was  $R_0$ . The procedure was to pass through a small  
117 GAC filter a large volume of concentrated FA solution (45 mg L<sup>-1</sup>) at a relatively slow flow  
118 rate, and to determine the cumulative adsorbed FA (as in Kummel *et al.*)<sup>6</sup> This procedure  
119 yielded the value  $R_0 = 0.0065 \pm 0.003$  M, which is somewhat larger than the value of 0.0049  
120 M<sup>6</sup>.

121 In the next stage a solution of 9.9 mg L<sup>-1</sup> of FA was passed through two GAC columns in  
122 series at a flow rate of 6 mL min<sup>-1</sup> (Table S4 below).

123 The parameter  $F_1$  was first determined from the initial stages of the adsorption, *i.e.*, under  
124 low occupation of the surface sites by FA, and then the parameter  $D_1$  was determined by  
125 using  $F_1$  values in fitting all the experimental data. A few rounds of calculations that  
126 introduced small variations in both  $F_1$  and  $D_1$  values were followed to optimize the fit of  
127 calculated values to the experimental ones. We chose to set the value of  $D_1$  as in Kummel  
128 *et al.*<sup>6</sup>. The statistical tests yielded an  $R^2 = 0.944$  (Table S4). The affinity parameter  $K = F_1/D_1$   
129 equals 14,000 L M<sup>-1</sup>. The value of the dimensionless quantity,  $Y = K * R_0$ , which can be used

130 for evaluating adsorption efficiency of FA, is 91, whereas in the case of filtration of stream  
 131 water by GAC<sup>6</sup>, a value of 71 was obtained. Hence, in terms of adsorption, the use of a GAC  
 132 filter in FA removal from Lake Kinneret water is expected to be more efficient than from  
 133 stream water.

134

135 **Table S4. Removal of FA dissolved in water, which included a similar**  
 136 **composition of salts as in Lake Kinneret, by two GAC filters in series (each 1.6 cm**  
 137 **diameter, 20 cm length) at a flow rate of 6 mL min<sup>-1</sup>. Experimental and**  
 138 **calculated values of C/C<sub>0</sub>.**

139

| Time<br>(h) | Experiment<br>C/C <sub>0</sub><br>(20 cm) | Model<br>C/C <sub>0</sub><br>(20 cm) | Experiment<br>C/C <sub>0</sub> at Exit<br>(40 cm) | Model C/C <sub>0</sub><br>at Exit (40<br>cm) |
|-------------|-------------------------------------------|--------------------------------------|---------------------------------------------------|----------------------------------------------|
| 1           | n.d.                                      | 0.112                                | 0.024                                             | 0.008                                        |
| 2           | n.d.                                      | 0.218                                | 0.025                                             | 0.025                                        |
| 3           | 0.45                                      | 0.34                                 | 0.058                                             | 0.054                                        |
| 4           | 0.5                                       | 0.46                                 | 0.07                                              | 0.095                                        |
| 5           | 0.56                                      | 0.56                                 | 0.19                                              | 0.15                                         |

140 <sup>a</sup> Initial concentration of FA at entry to the filter was 0.011 mM (9.9 mg L<sup>-1</sup>). The  
 141 fraction of the pore volume in the filters was 0.57. The parameters used in the  
 142 calculations were:

143  $R_0 = 0.0065 \text{ M}$ ;  $F_I = 140 \text{ M}^{-1}\text{min}^{-1}$ ;  $D_I = 0.01^{-1}$ .

144 The statistical criteria were  $R^2 = 0.944$ ;  $\text{RMSE} = 0.055$ .

145 n.d.: not determined

146

147

148

149

150

151

152

153

154

155

156

157

158

159 **7.2 Increasing the capacity of the GAC column to improve THMF removal performance**

160 **Table S5. Effect of GAC filter length on removal of FA and NABS<sub>254</sub> from Lake Kinneret water:**  
 161 **Calculated values of C/C<sub>0</sub> and percent of degradation at different times<sup>a</sup>**

| Time | Filter length (cm) | C/C <sub>0</sub> FA | Percent Degradation of FA (%) | C/C <sub>0</sub> NABS <sub>254</sub> | Percent Degradation of NABS <sub>254</sub> (%) |
|------|--------------------|---------------------|-------------------------------|--------------------------------------|------------------------------------------------|
| 15 h | 75                 | 0.502               | 39.9                          | 0.731                                | 23.4                                           |
|      | 100                | 0.399               | 46.5                          | 0.657                                | 29.2                                           |
|      | 150                | 0.234               | 54.1                          | 0.531                                | 39.6                                           |
| 24 h | 75                 | 0.504               | 43.5                          | 0.731                                | 24.7                                           |
|      | 100                | 0.399               | 51.1                          | 0.658                                | 31.1                                           |
|      | 150                | 0.249               | 61.8                          | 0.531                                | 41.7                                           |
| 48 h | <b>75</b>          | 0.504               | 46.6                          | 0.731                                | 25.8                                           |
|      | <b>100</b>         | 0.400               | 55.8                          | 0.658                                | 32.7                                           |
|      | <b>150</b>         | 0.250               | 68.4                          | 0.531                                | 44.3                                           |
| 5 d  | 75                 | 0.505               | 48.4                          | 0.731                                | 26.4                                           |
|      | 100                | 0.401               | 58.2                          | 0.658                                | 33.5                                           |
|      | 150                | 0.251               | 72.2                          | 0.531                                | 45.8                                           |
| 7 d  | 75                 | 0.505               | 48.6                          | 0.731                                | 26.5                                           |
|      | 100                | 0.401               | 58.7                          | 0.658                                | 33.7                                           |
|      | 150                | 0.251               | 73.0                          | 0.531                                | 46.1                                           |

162 <sup>a</sup> The radius of the cylindrical pilot column was 13 cm; the flow rate was 330 L h<sup>-1</sup>. The initial  
 163 concentrations of FA and NABS<sub>254</sub> in the water were 1.2 · 10<sup>-6</sup> and 2.01 · 10<sup>-5</sup> M, the kinetic  
 164 adsorption rates (F<sub>1</sub>, F<sub>2</sub>) were 140 and 60 M<sup>-1</sup>min<sup>-1</sup>, the dissociation rate constants (D<sub>1</sub>, D<sub>2</sub>) were  
 165 0.01 min<sup>-1</sup> and the degradation rate constants (Kd<sub>1</sub>, Kd<sub>2</sub>) were 0.0025 and 0.0027 min<sup>-1</sup>,  
 166 respectively.

167

168

169

170

171 **7. Supplementary references**

172 1. O. B. Zusman, M. L. Kummel, J. M. De la Rosa and Y. G. Mishael, Dissolved organic  
173 matter adsorption from surface waters by granular composites versus granular activated  
174 carbon columns: An applicable approach, *Water Res.*, 2020, **181**, DOI:10.1016/j.watres.2020.  
175 115920.

176 2. C. Donau, *Donau Carbon*, 2010, **4**, 81–94.

177 3. S. M. Korotta-Gamage and A. Sathasivan, A review: Potential and challenges of  
178 biologically activated carbon to remove natural organic matter in drinking water purification  
179 process, *Chemosphere*, 2017, **167**, 120–138.

180 4. T. Zohari, A. Sukenik, T. Berman, A. Nishri, in *Lake Kinneret: Ecology and Management*  
181 *Aquatic Ecology Series* Springer, 2014, ch. 10, 34.

182 5. Y. Barkay-Arbel, Precursors removal and reduction of disinfection by-products  
183 formation by enhanced coagulation and sedimentation in the NWC system, *M.Sc. Thesis*,  
184 Technion - Israel Institute of Technology, 2013.

185 6. M. L. Kummel, I. A. Shabtai, S. Nir and Y. G. Mishael, DOM removal from surface water  
186 by activated carbon vs. a nanocomposite: an experimental and modeling approach to  
187 optimize treatment, *Environ. Sci.: Water Res. Technol.*, 2023, **9**, 1531–1544.

188
